# Supplementary material for: Ribosome profiling of the retrovirus murine leukemia virus
Source: PubMed Central journal article supplement (PMC5778647; doi:10.1186/s12977-018-0394-5), 2018-01-22
Supplement: 12977_2018_394_MOESM1_ESM.pdf [file 12977_2018_394_MOESM1_ESM.pdf]

**Table S1. Library composition statistics.**

| <b>condition</b> | <b>protocol</b> | <b>repeat number</b> | <b>total reads</b> | <b>host rRNA</b> | <b>host mRNA</b> | <b>vRNA</b> |
|------------------|-----------------|----------------------|--------------------|------------------|------------------|-------------|
| MuLV-infected    | RiboSeq-HAR     | 1                    | 29,905,213         | 17,573,501       | 2,756,705        | 165,656     |
| MuLV-infected    | RiboSeq-CHX     | 1                    | 62,356,362         | 33,006,799       | 10,040,974       | 582,520     |
| MuLV-infected    | RNASeq          | 1                    | 99,527,314         | 1,482,962        | 1,282,214        | 154,635     |
| Mock             | RiboSeq-CHX     | 1                    | 43,094,925         | 25,920,498       | 5,057,967        | 80          |
| Mock             | RNASeq          | 1                    | 34,775,440         | 1,029,062        | 1,821,065        | 67          |
| MuLV-infected    | RiboSeq-CHX     | 2                    | 11,330,744         | 4,218,443        | 1,065,369        | 55,629      |
| MuLV-infected    | RNASeq          | 2                    | 17,356,077         | 175,706          | 310,572          | 60,000      |
| Mock             | RiboSeq-CHX     | 2                    | 7,929,327          | 4,423,625        | 527,718          | 29          |
| Mock             | RNASeq          | 2                    | 17,913,345         | 177,718          | 1,394,606        | 24          |

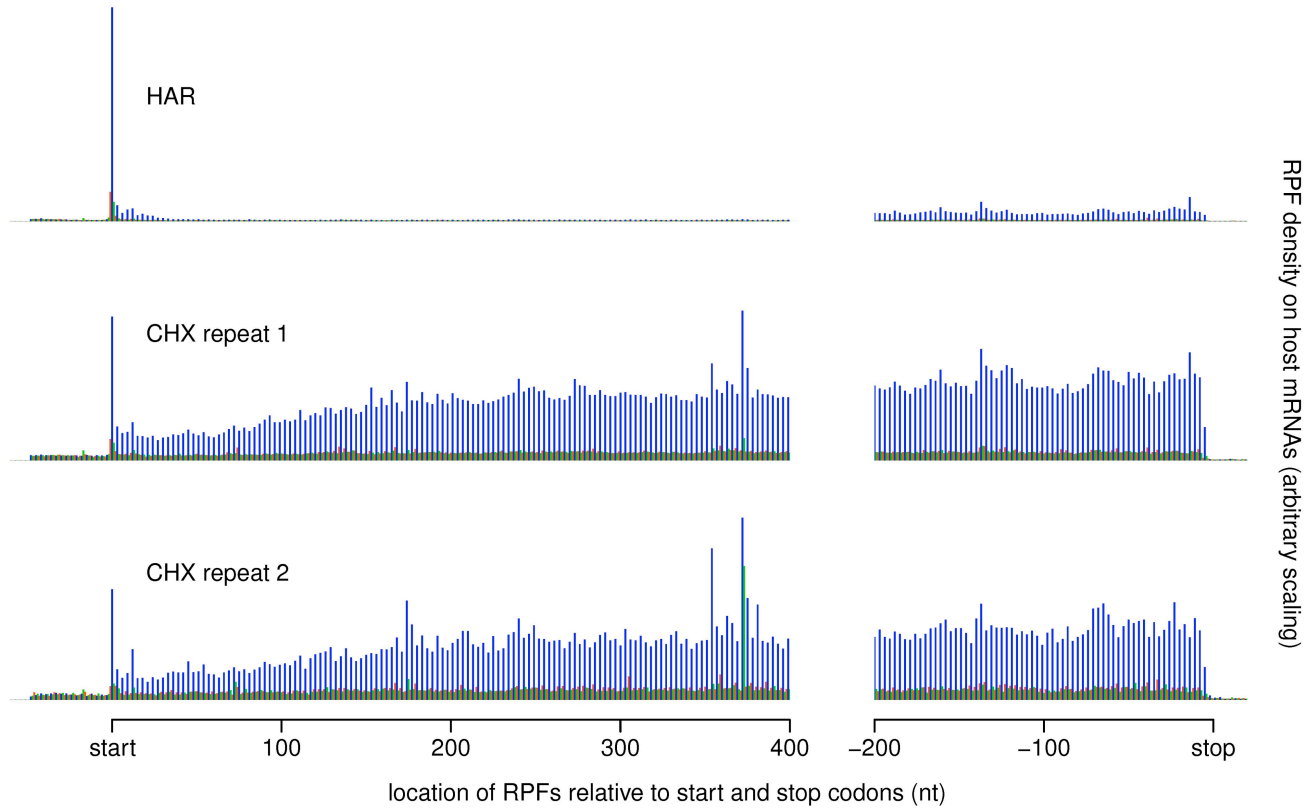

**Figure S1. RPF distributions on host mRNAs.** Histograms of RPF 5' end positions with a +12 nt offset to approximate the ribosomal P-site, relative to annotated initiation and termination codons summed over all host RefSeq mRNAs for the RiboSeq libraries. Reads whose 5' ends map to the first, second or third positions of codons are indicated in blue, green or orange, respectively. The majority of RPFs map to the first nucleotide of codons indicating excellent phasing of the RiboSeq libraries.

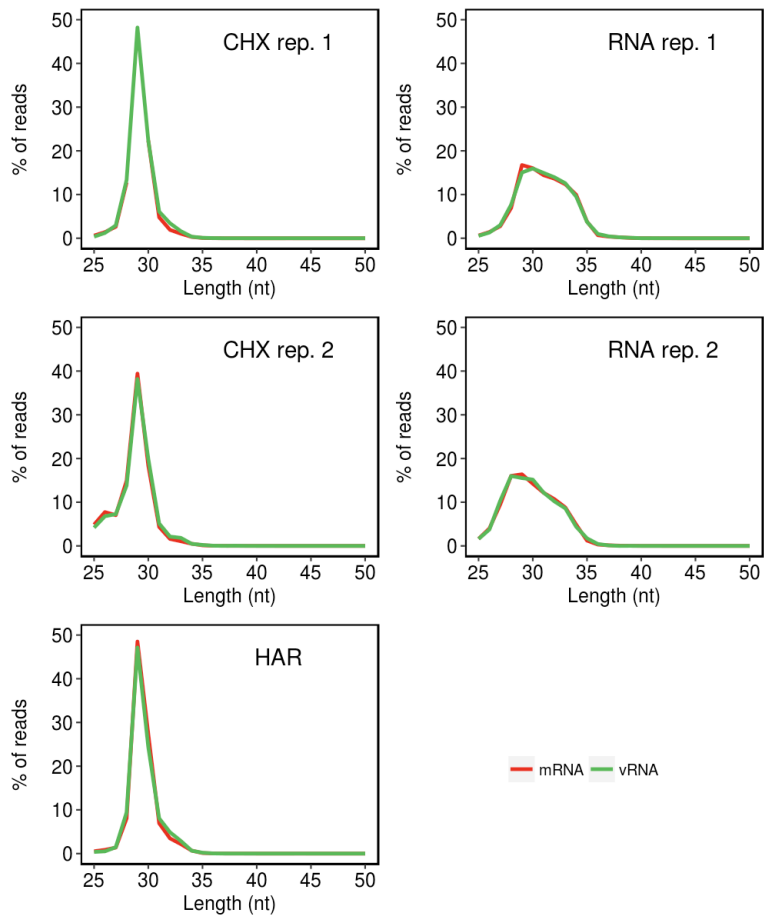

**Figure S2. Length distributions of reads mapping to viral and host RNA.** Line plots show the percentage of reads at the indicated length; green lines correspond to reads mapping within the viral *gag* ORF, and red lines correspond to reads mapping within the coding region of any host RefSeq mRNA. Close agreement between virus and host read-length distributions indicates absence of virus-related contamination [5].

|          |                                                              |          |
|----------|--------------------------------------------------------------|----------|
| AF033811 | UAGCUCUGUAUCUGGCGGACCCGUG---GUGGAACUGACGAGUUC---GGAACACCCGGC | MoMULV   |
| U94692   | UAGCUCUGUAUCUGGCGGACCCGUG---GUGGAACUGACGAGUUC---GAGACACCCGGC | R-MULV   |
| X02794   | UAGCUCUGUACCUGGCGGACCCGUG---GUGGAACUGACGGGUUC---GAGACACCCGGC | F-MULV   |
| J01998   | UAGAUCUGUAUCUGGCGGCUCGUG---GAAGAACUGACGAGUUC---GUAUU-CCCGAC  | AKV-MULV |
| AF033812 | UAGCUCUGUAUCUGGCGGACCCGUG---GUGGAACUGACGAGUUC---GGAACACCCGGC | A-MULV   |
| AB060732 | -----UGGAGUCG---AAGGAGCUGACGAGCUC---GAACUUCGCCCC             | FeLV     |
| KT724049 | AAUCACUCUGUG--AGUGAUGUGUGAGUAGCGAACAGACGUGUUCGGGGGCUCACCGCCU | GaLV     |
| KT724051 | GAUCGCUCUGUG--AGCGACGUGUGAGUAGCGAGCAGACGUGUUCGGGGGCUCACCGCCC | WMSV     |
| AB979448 | GUCGGCCAACCUUCGUAGGAGUGUAGAGGGAGGACAGCUGUCCUGGACC--CUCACAC   | BaEV     |
| KF786286 | AAUCGAUCUAAG--AUCGAGGCGUGAGUAGCGGACAGACGUGUUCGGGGGCUCACCGCCC | KoRV     |
| EF133960 | UCUCAGACCGUAAGGACUGGAGGACUGUGAUCAGCAGACGUGCUAGGAGGAUCACAGG-C | PERV     |
| JQ303225 | GAGAAUUCUCACGGGAAGGAAAGUG---CGGUUACGACCCUGGA---GGCUCCAUUACU  | RfRv     |
| AY842951 | GAGGAUUUGGGAGGAUCGGAGUGGCG-----GGACGUCGCCGGAAGCUCACCUC       | REV      |
| KF313137 | GAGGGUUUGGGAGGAUCGGAGUGGCG-----GGACGUCGCCGGAAGCUCACCUC       | DIAV     |
|          |                                                              |          |
| AF033811 | CGCAACCUGGGAGACGUCCAGGGACUUCGGGGCCGUUUUUGUGGCCCGACCUGAGUC    | MoMULV   |
| U94692   | CGCAACCUGGGAGACGUCCAGGGACUUCGGGGCCAUUUUUGUGGCCCGGCCAGAGUC    | R-MULV   |
| X02794   | CGCAACCUGGGAGACGUCCAGGGACUUCGGGGCCAUUUUUGUGGCCCGGCCAGAGUC    | F-MULV   |
| J01998   | CGCAGCCUGGGAGACGUCUCAGAGGCAUCGGGGCCCGCUGGGUGGCCCAAUCAGUAAG   | AKV-MULV |
| AF033812 | CGCAGCCUGGGAGACGUCUCAGAGGCAUCGGGGCCCGCUGGGUGGCCCAAUCAGUAAG   | A-MULV   |
| AB060732 | CGCAACCUGGAAGACGUUCCACGGGUGUCUGAUGUCUGGAGCCU-----CUAG        | FeLV     |
| KT724049 | GGUAAUCUUGGGAGACGUCCAGGAUCAGGGAGGACCAGGGACG-----             | GaLV     |
| KT724051 | GGUAAUCCUGGGAGACGUCCAGGAUCAGGGAGGACCAGGGACG-----             | WMSV     |
| AB979448 | GGUAAUCCUGGGAGACGUCCAGGAUCAGGGAGGACCAGGGACG-----             | BaEV     |
| KF786286 | GGCAAUCCUGGGAGACGUCCAGGAUCAGGGAGGACCAGGGACG-----             | KoRV     |
| EF133960 | UGCCGCCUGGGGGACGCCCGGGAGGUGGGAGAGCCAGGGACG-----              | PERV     |
| JQ303225 | UGAAGUCGUAGGAGACGUCCCGACGAGAAGGUGGCCAGCGACG-----UCCGCA       | RfRv     |
| AY842951 | GCUC--AGCAGGGGACGCCUGAUCUGGGUUCUGUGUAUCUGAU-----             | REV      |
| KF313137 | GCUC--AGCAGGGGACGCCUGGCCUGAGUUCUGUGAUUUCUGAU-----            | DIAV     |
|          | *   ****                                                     |          |

**Figure S3. Alignment of the 5' regions of gammaretroviral genomic sequences.** Alignment positions corresponding to the GUG codon in MuLV at which translational initiation was detected in RiboSeq HAR libraries, and the CUG codon in MuLV at which Glyco-Gag synthesis was previously reported to initiate, are highlighted in green and purple, respectively. Key: MoMuLV, Moloney murine leukemia virus; R-MuLV, Rauscher murine leukemia virus; F-MuLV, Friend murine leukemia virus; AKV-MuLV, AKV murine leukemia virus; A-MuLV, Abelson murine leukemia virus; FeLV, feline leukemia virus; GaLV, gibbon ape leukemia virus; WMSV, woolly monkey sarcoma virus; BaEV, baboon endogenous virus; KoRV, koala retrovirus; PERV, porcine endogenous retrovirus; RfRV, Rhinolophus ferrumequinum retrovirus; REV, reticuloendotheliosis virus; DIAV, duck infectious anemia virus.

|          |     |     |     |     |     |     |     |     |     |     |     |     |     |     |     |     |     |     |     |     |          |
|----------|-----|-----|-----|-----|-----|-----|-----|-----|-----|-----|-----|-----|-----|-----|-----|-----|-----|-----|-----|-----|----------|
| AF033811 | CUC | CAA | GCU | CAC | UUA | CAG | GCU | CUC | UAC | UUA | GUC | CAG | CAC | GAA | GUC | UGG | AGA | CCU | CUG | GCG | MoMULV   |
| U94692   | CUC | CAA | GCU | CAU | UUA | CAG | GCA | CUC | UAC | CUG | GUC | CAG | CAC | GAA | GUC | UGG | AGA | CCG | CUG | GCG | R-MULV   |
| X02794   | CUC | CAA | GCU | CAU | UUA | CAG | GCA | CUC | UAC | CUG | GUC | CAG | CAC | GAA | GUC | UGG | AGA | CCG | UUG | GCG | F-MULV   |
| J01998   | CUC | CAA | GCU | CAC | UUA | CAG | GCC | CUC | CAA | ACG | GUG | CAG | CGA | GAA | AUU | UGG | AAA | CCA | CUG | GCC | AKV-MULV |
| AB060732 | AUG | CAG | GCA | CAU | UUA | CGC | GCC | CUG | CAG | CUG | AUC | CAA | GAG | GAG | AUC | CAG | AGA | CCU | CUA | GCA | FeLV     |
| KT724049 | UUA | UUU | ACU | CAU | UUA | AAG | GCU | UUA | GAA | GUU | GUG | AGG | ACC | CAG | AUC | UGG | CAC | CAG | AUC | AAG | GaLV     |
| KT724051 | UUA | UUU | ACU | CAU | UUA | AAG | GCU | UUA | GAA | GUU | GUG | AGG | ACC | CAG | AUC | UGG | GAC | CAG | AUC | AAG | WMSV     |
| AB979448 | CUA | CAG | GCC | CGG | CUA | AAA | GGA | CUA | CAA | GCA | GUA | CAG | GCC | CAA | AUC | UGG | GCC | CCC | UUG | GCA | BaEV     |
| KF786286 | CUA | UUU | ACC | CAC | UUG | AAG | GCU | UUA | GAG | GUU | GUG | AGG | ACU | CAG | AUC | UGG | GAC | CAG | AUA | AAA | KoRV     |
| EF133960 | UUG | UUC | UCU | AGG | CUC | AAG | GCG | CUC | GAG | UGG | GUG | AGG | CAG | CGA | GCG | UGG | AAG | CAG | CUC | CGG | PERV     |
| JQ303225 | UAU | CUG | GCC | AGU | UUA | AAG | GCC | CUA | CAA | GGG | GUC | CAA | CAU | GAG | AUA | UGG | CCC | CUA | GUG | AGU | RfRv     |
| AY842951 | CUG | CUU | AAG | UCC | CUA | CAG | GCC | CUC | CAA | GCU | ACU | AGG | UCU | CUG | GCU | CGG | GCA | ACG | CUG | CGC | REV      |
| KF313137 | UUG | CUU | AAG | UCC | CUA | CAG | GCC | CUC | CAA | GCC | ACU | AGG | UCU | CUG | GCU | CGG | GCA | GCG | CUG | CGU | DIaV     |
|          |     |     |     |     |     |     |     |     |     |     |     |     |     |     |     |     |     |     |     |     |          |
| AF033811 | GCA | GCC | UAC | CAA | GAA | CAA | CUG | GAC | CGA | CCG | GUG | GUA | CCU | CAC | CCU | UAC | CGA | GUC | GGC | GAC | MoMULV   |
| U94692   | GCA | GCU | UAC | CAA | GAA | CAA | CUA | GAC | CGG | CCG | GUA | GUA | CCU | CAC | CCU | UUC | CGA | GUC | GGU | GAC | R-MULV   |
| X02794   | GCA | GCU | UAC | CAA | GAG | CAA | CUA | GAC | CGG | CCG | GUA | GUA | CCU | CAC | CCU | UUC | CGG | GUC | GGU | GAC | F-MULV   |
| J01998   | GAG | GCC | UAC | CGG | GAC | CAA | CUA | GAC | CAA | CCA | GUG | AUA | CCA | CAC | CCC | UUC | CGG | AUU | GGA | GAC | AKV-MULV |
| AB060732 | GCA | GCC | UAC | CGA | GAA | AAG | CUC | CAA | ACC | CCG | GUC | GUG | CCG | CAC | CCC | UUC | AAA | CCA | GGA | GAC | FeLV     |
| KT724049 | GAG | GUA | UAU | AAG | CCC | GGU | ACC | GUG | --- | --- | ACA | AUC | CCC | CAC | CCG | UUC | CAG | GUC | GGG | GAU | GaLV     |
| KT724051 | GAG | GUG | UAC | AAG | CCC | GGU | ACC | GUG | --- | --- | GCA | AUC | CCC | CAC | CCG | UUC | CAG | GUC | GGG | GAC | WMSV     |
| AB979448 | GAA | CUG | UAC | CGG | CCA | GGA | CAU | UCG | --- | --- | CAG | ACC | AGC | CAC | CCC | UUC | CAG | GUG | GGG | GAC | BaEV     |
| KF786286 | GAA | GCC | UAC | AGG | CCU | GGU | ACU | GUG | --- | --- | GCC | AUU | CCC | CAC | CCG | UUC | CAG | GUC | GGU | GAC | KoRV     |
| EF133960 | GAG | GCC | UAC | UCA | GGA | GGA | GAC | UUG | --- | --- | CAA | GUU | CCA | CAU | CGC | UUC | CAA | GUU | GGG | GAU | PERV     |
| JQ303225 | GAG | GCC | UAC | UCA | GGA | GGA | GAC | UUG | --- | --- | CAA | GUU | CCA | CAU | CGC | UUC | CAA | GUU | GGG | GAU | RfRv     |
| AY842951 | GAC | CAA | CUG | CCC | CAG | AAA | GAA | GCU | CAG | CAA | GAC | CGU | ACC | CCA | CUG | UUC | CAA | CCU | GGU | GAC | REV      |
| KF313137 | GAC | CAA | CUG | CCC | CAG | AAA | GAA | GCU | CAG | CAA | GAC | CGU | ACC | CCA | CUG | UUC | CAA | CCU | GGU | GAU | DIaV     |

**Figure S4. Codon-based alignment of gammaretroviral *pol* genes downstream of the *env* splice acceptor.** Alignment positions corresponding to the CUG codons of *env*-uORF-1 and *env*-uORF-2 in MuLV are highlighted in green and purple, respectively. Potential alternative initiation codons for translation of the C-terminal domain of the integrase protein are highlighted in cyan. Virus name abbreviations are given in the Figure S3 caption.
